1 **Characterization and elimination of stochastically**  
2 **generated persister subpopulation in mycobacteria**

3

4 Vivek Srinivas<sup>1</sup>, Mario Arrieta-Ortiz<sup>1</sup>, Eliza J.R. Peterson<sup>1\*</sup>, Nitin S. Baliga<sup>1-4\*</sup>

5

6 <sup>1</sup>Institute for Systems Biology, 401 Terry Ave N., Seattle WA 98109 USA.

7 <sup>2</sup>Departments of Biology and Microbiology, University of Washington, Seattle, WA, USA

8 <sup>3</sup>Molecular Engineering Program, University of Washington, Seattle, WA, USA

9 <sup>4</sup>Lawrence Berkeley National Lab, Berkeley, CA, USA

10

11 \* Corresponding authors:

12 Eliza J.R. Peterson: [epeterso@systemsbiology.org](mailto:epeterso@systemsbiology.org);

13 Nitin S. Baliga: [nbaliga@systemsbiology.org](mailto:nbaliga@systemsbiology.org)

14

## 15 Highlights

16

- 17 • We have developed a novel method, Per-Sort, to isolate a small proportion of  
18 translationally dormant cells that pre-exist in *Mycobacterium spp.* cultures growing  
19 under optimal conditions but dramatically increase in proportion under stressful  
20 conditions.
- 21 • The pre-existing translationally dormant cells have lower oxygen consumption,  
22 significantly longer lag phase to initiate growth in nutrient rich medium, and high  
23 tolerance to >10x MIC concentrations of isoniazid (INH) and rifampicin (RIF), indicating  
24 they are a subpopulation of persister cells.
- 25 • Single-cell expression profiling demonstrated that the persisters are a heterogenous  
26 mixture of toxin (VapC30 and MazF) and alarmone response (RelA/SpoT) expressing  
27 cells.
- 28 • A shared outcome of high toxin and alarmone response is reduced cellular oxidative  
29 metabolism, which we demonstrate is reversed upon addition of L-cysteine to reduce  
30 the proportion of pre-existing persister cells and increase killing by INH and RIF.

31

## 32 Summary

33 *Mycobacterium tuberculosis* (MTB) is able to persist in the host for long periods of time, even  
34 during antibiotic treatment. Eliminating persister cells, which are implicated as the primary  
35 reason for treatment failure, is essential for shortening TB treatment regimen. Here, we report  
36 a novel methodology, Per-Sort, to identify and sort miniscule numbers of translationally  
37 dormant mycobacterial cells within an isogenic *mycobacterium* population. Using Per-Sort we  
38 have discovered that translationally dormant cells pre-exist (under optimal growth conditions)  
39 as a fraction of a percent of isogenic mycobacterial cultures, suggesting they are generated  
40 stochastically as a bet hedging strategy. We show that this pre-existing translationally dormant  
41 subpopulation of cells are tolerant to antibiotics, small in size, low in oxidative metabolism, and  
42 expand in number upon nutrient starvation. Finally, through transcriptional profiling at single  
43 cell resolution, we've determined that the pre-existing persisters are a heterogeneous mix of  
44 *vapC30*, *mazF*, and *relA/spoT* overexpressing cells that are eliminated and sensitized to  
45 antibiotic killing through induction of respiration.

46

47 **Keywords:** Mycobacterium, preexisting persisters, antibiotic tolerance, nutrient starvation

48

## 49 Introduction

50

51 Persister cells, a subpopulation of cells which are refractory to drug killing, are  
52 problematic to the chemotherapeutic treatment of tuberculosis (TB) disease. *Mycobacterium*

53 *tuberculosis* (MTB) persister cells are considered a major reason why a quarter of all TB patients  
54 require 6 months of treatment and 5% are not cured even then [1]. In addition to treatment  
55 failure, persister cells lead to recalcitrant infections [1,2] and the emergence of genetically-  
56 encoded drug resistance [3,4]. A better understanding of the intrinsic heterogeneity that leads  
57 to persister subpopulation(s) within a clonal population of mycobacteria is necessary to  
58 effectively treat persistent TB infections.

59 Persisters are drug tolerant bacteria, often associated with slow-growth and reduced  
60 metabolic activity [5,6]. However, the association between growth-arrest and persisters is  
61 currently a subject of intense debate. Importantly, persisters can re-establish drug sensitivity  
62 and normal growth upon culture in standard media. Resumption of normal growth is a key  
63 characteristic of persisters and distinguishes them from other antibiotic tolerant forms such as  
64 viable but non-cultivable cells (VBNCs) [7]. Given their similarity but important difference,  
65 VBNCs have obscured the characterization of persister cells; especially in studies using standard  
66 “persister assay” methods, which treat bacteria with antibiotics and collect the remaining non-  
67 lysed cells (considered persisters) by centrifugation. Therefore, we sought to establish a high-  
68 fidelity isolation technique to study mycobacteria that fit the fundamental definition of  
69 persisters, antibiotic tolerance and growth resumption in standard media. Furthermore, we  
70 sought a method that identified persisters independent of antibiotic selection, in other words,  
71 persisters that pre-exist in an isogenic culture in the absence of drugs (or other) pressure. Such  
72 pure fractions of persisters will enable an understanding of the processes for generating and  
73 maintaining diversity in mycobacteria.

74 Fluorescent reporters have enabled a repertoire of techniques to be developed and  
75 applied to study microbial community subpopulations, without the use of selection. In MTB,  
76 single-cell heterogeneity was captured *in vitro* and during murine infections using a reporter of  
77 16s rRNA gene expression [8]. The microscopy-based platform was able to track heterogeneity  
78 in growth rate under standard growth conditions and found heterogeneity was amplified by  
79 stress conditions and murine infection. However, the non-growing subpopulation was not  
80 isolated and characterized further, most likely due to low fluorescence levels of the reporter. In  
81 another study, Jain *et al* developed a dual-reporter mycobacteriophage ( $\phi^2$ DRM) system to sort  
82 and reveal pre-existing isoniazid (INH) tolerant MTB from *in vitro* cultures and human sputa [9].  
83 Unfortunately, the necessity to re-infect daughter cells with  $\phi^2$ DRM limited the ability to follow  
84 isolated cells over generations and study their regrowth patterns. Therefore, we designed an  
85 integrative inducible fluorescence reporter system that produced measurable fluorescence for  
86 isolation of heterogeneous subpopulations by cell sorting, and the ability to follow the  
87 population structure over generations. Previous studies have demonstrated that translation is  
88 suppressed in persisters, compared to actively growing cells [10,11]. In this study, we report a  
89 translation readout system based on an inducible fluorescent reporter that exploits this  
90 phenotypic trait to isolate and comprehensively characterize pre-existing, slow-growing  
91 persisters within a heterogeneous isogenic population of an actively growing mycobacterial  
92 culture. By performing single cell transcriptional profiling and phenotypic characterization of  
93 sorted mycobacterial subpopulations, we present evidence that persisters are generated

94 stochastically through a variety of mechanisms via a bet hedging strategy. We demonstrate that  
95 mycobacteria anticipate drug exposure upon sensing nutrient starvation to adaptively expand  
96 the persister cell subpopulation and proportionally increase drug tolerance. Finally, we  
97 demonstrate that notwithstanding the varied mechanisms by which persister cells are  
98 generated, they converge on a similar low oxygen (O<sub>2</sub>) metabolic state that can be reversed  
99 through activation of respiration with cysteine to increase antibiotic susceptibility and eliminate  
100 persisters that are increased under physiological conditions.

101

## 102 **Results and Discussion:**

103

### 104 **Per-Sort isolates pre-existing translationally dormant *Mycobacterium* cells that are antibiotic 105 tolerant**

106

107 To identify translationally heterogeneous subpopulations in mycobacteria, we  
108 generated a reporter plasmid with mEos2 fluorescent reporter[12] under the transcriptional  
109 control of an anhydrotetracycline (ATc) inducible promoter and a strong mycobacterial  
110 translation initiation signal (trans-mEos2). The plasmid also encoded an integrase gene for  
111 chromosomal integration in *Mycobacterium spp.* genomes (see methods). The reported  
112 plasmid was transfected into *Mycobacterium smegmatis* (mc<sup>2</sup>155) (MSM-mEos2) and  
113 fluorescence-activated cell sorting (FACS) was used to differentiate single mycobacterial cells  
114 based on mEos2 fluorescence level. Cell sorting was optimized using a mixed culture of ATc  
115 induced MSM-mEos2 cells (resistant to kanamycin) and MSM cells expressing mCherry  
116 (resistant to hygromycin) [13] with 1 μm beads for calibration. Cells from the mixed cultures  
117 were sorted and plated onto 7H10 plates with appropriate antibiotic selection. We observed a  
118 separation efficiency of 95% (**Fig S1a**), demonstrating our FACS sorting method reports on  
119 population structure and not an artifact of cell clumping [14]. We further defined gates for  
120 mEos2 fluorescing and non-fluorescing cells using heat killed and non-induced cells (**Fig S1b**).  
121 Using the optimized FACS method and MSM-mEos2 reporter strain, we found that post-  
122 induction with ATc, a majority of the overall population had fluorescence (“lit” cells), while a  
123 small fraction (<1%) were non-fluorescing (“dim cells”, **Fig 1a**).

124

125 To confirm that the dim and lit cells have similar mEos2 transcript levels and that the  
126 difference in fluorescence is due to variation in translation rate, we isolated mRNA from  
127 300,000 cells from each sorted dim and lit subpopulations. We quantified mEos2 transcript  
128 levels by qRT-PCR, using the constitutive expression of the kanamycin selection gene for  
129 normalization. The mEos2 transcript levels were not significantly different between the dim and  
129 lit subpopulations (**Fig 1b**), confirming that the absence of fluorescence in the dim cells is likely  
130 due to reduced rate of translation.

131

132 Next, in order to ascertain that there were no VBNCs within sorted dim and lit cells, we  
assayed their viability by sorting 10,000 cells from each subpopulation (including dead cells as

133 control), and plated 1:100 dilution onto 7H10 plates. The percentage of cultivable cells was  
134 identical (90%) across the dim and lit populations, confirming that neither population was over-  
135 represented with VBNCs (**Fig 1c**). We further investigated characteristics of regrowth of dim and  
136 lit cells by sorting 1000 cells of each subpopulation into 7H9 media. When the cultures reached  
137 an OD<sub>600</sub> of 0.6, the expression of mEos2 was induced by addition of ATc and incubation for 12  
138 hours, thereafter the cultures were re-analyzed by flow cytometry. Cultures generated from  
139 both dim and lit subpopulations had similar structure as the parent population vis-à-vis  
140 proportions of dim and lit cells, 99.5% lit cells and 0.5% dim cells (**Fig 1d**). These results  
141 demonstrated that translational dormancy of dim cells is not heritable and that the population  
142 structure is generated stochastically with dim and lit cells dividing to produce daughter cells of  
143 each type at a fixed probability (dim cells @p=0.05, and lit cells @p=0.95) under optimal growth  
144 conditions.

145 We investigated drug susceptibility of dim and lit subpopulations, given the known  
146 relationship between phenotypic heterogeneity and drug tolerance [8,15,16]. Using FACS, we  
147 sorted 10,000 cells each of the dim and lit subpopulations into 7H9 media containing ~10x MIC  
148 of isoniazid (INH) or rifampicin (RIF) for 8 hours. The cells were incubated at 37°C with antibiotic  
149 for 8 hours, washed in 7H9 media and dilutions plated onto 7H10. By comparing CFUs from the  
150 subpopulations before and after antibiotic treatment, we observed that a significantly greater  
151 proportion of dim cells survived in the presence of high concentrations of INH and RIF (**Fig 1e**),  
152 demonstrating that the translationally dormant dim cells are refractory to antibacterial killing.  
153 Further, these results demonstrate that translationally dormant, drug tolerant persisters pre-  
154 exist in small numbers (<0.5%) within an isogenic population of MSM growing under optimal  
155 growth conditions. Importantly, the results also demonstrate the capability of the Per-Sort  
156 technology to identify and sort these translationally dormant persisters, even though they exist  
157 as a tiny fraction of the overall population. We demonstrated that this technology is  
158 generalizable to other mycobacteria by performing Per-Sort with MTB transformed with the  
159 trans-mEos2 reporter. We observed similar translational heterogeneity and a similar size  
160 subpopulation of pre-existing INH tolerant persisters under optimal growth conditions (**Fig S2**).

161  
162 **Translationally dormant pre-existing persisters are characterized by small size, reduced**  
163 **respiration and longer lag phase.**

164  
165 While performing Per-Sort, we observed that intensity of side scatter by dim cells (SSC)  
166 was lower relative to lit cells, indicating they were smaller in size relative to lit cells (**Fig 2a**).  
167 Further, size distribution of dim cells was narrow across the subpopulation with >95% of the  
168 cells measuring <1 µm, whereas the size distribution of lit cells spanned from < 1 µm to > 3.5  
169 µm (**Fig S3a**). The small size morphology of the dim cells is comparable to the 1 µm small resting  
170 cells (SMRCs) of MSM discovered during gentle starvation [16]. In addition to small size, SMRCs

171 were found to have extreme antibiotic tolerance and reduced metabolic activity [16].  
172 Therefore, we assayed the level of oxidative metabolism within dim and lit cells with Per-Sort  
173 and estimated relative Reactive Oxygen Species (ROS) levels within each subpopulation using  
174 the ROS indicator dye CellROX orange. The positive control for this study (i.e., ROS+ cells) was  
175 generated by triggering ROS production across the ATc induced MSM-mEos2 culture by adding  
176 tert-butyl hydroperoxide. Similarly, a negative control was also included by treating the ATc  
177 induced MSM-Eos2 culture with N-acetyl-cysteine to quench ROS (**Fig 2b**). The lower CellROX  
178 orange fluorescence of dim cells compared to lit cells, indicated that dim cells had low ROS  
179 levels (we show later that this is potentially because of a subdued citric acid (TCA) cycle, a  
180 major source of ROS [17]).

181 As previously shown by Wu *et al*, SMRCs grow out to ‘large’ cells before resuming  
182 normal cell division, exhibiting a lag phase of 6 h without increase in CFUs during regrowth [16].  
183 To look at the regrowth properties of the dim and lit subpopulations, we used an adaptation of  
184 ScanLag, a technique that combines cell plating with high-throughput dynamic imaging [18].  
185 Per-Sorted dim and lit cells (100 cells) were plated onto 7H10 media and observed via ScanLag  
186 for 3 days and pictures were taken at the interval of 90 mins. Colonies from the lit population  
187 were collected from both the high and low mEOS2 fluorescence intensity spectrum. Regardless  
188 of the relative translational status of cells (i.e., fluorescence intensity), the time of appearance  
189 (TOA) of colonies from lit cells was the same (**Fig 2c**), indicating that this subpopulation was  
190 phenotypically uniform with respect to growth. By contrast, TOA of colonies from dim cell  
191 subpopulation occurred over a broader time range and on average 10 h after the lit cells (**Fig**  
192 **2c**). The longer lag phase of the dim cells was reproduced in liquid cultures, wherein growth  
193 was monitored by recording absorbance (OD<sub>600</sub>) at 30 m intervals for 3 days (**Fig S3b**). However,  
194 there was no difference in maximum growth rate between dim and lit cultures (OD<sub>600</sub> slope =  
195 0.12 Hr<sup>-1</sup> for both) once cell division resumed. Delayed growth resulting from an extended lag  
196 time is a phenotype well-established with drug tolerance [4,19].

197

### 198 **Nutrient starvation increases proportion of translationally dormant persister cells**

199

200 The striking similarities between SMRCs and dim cells led us to hypothesize that dim  
201 cells are a phenotypically distinct subpopulation of cells that pre-exist in the bulk population to  
202 ensure survival in fluctuating environments. If so, we predicted that the proportion of dim cells  
203 in the population would increase in response to environmental change, such as starvation and  
204 drug pressure. To test this, MSM-mEos2 cells were grown in 7H9 media with varying amounts  
205 of glycerol (0.5% and 0.001%), until cultures reached exponential growth. We then induced the  
206 cultures with ATc and performed Per-Sort on half of the sample and the other half of the  
207 starved culture was treated with 10x MIC of INH and 5x MIC of RIF for 12 hours and assessed  
208 for antibiotic survival, as described previously in **Fig 1e**. Analysis by Per-Sort discovered a 10-

209 fold increase in dim cells induced by starvation (**Fig 3a**). The starvation-induced increase in dim  
210 cell proportion was also associated with a proportional increase in tolerance to INH in the bulk  
211 population (**Fig 3b**). We also grew MSM cells in 7H9 media with standard (0.5% v/v) or low  
212 (0.005% v/v) glycerol until the cultures reached saturation. We diluted and plated aliquots of  
213 these cultures onto 7H10 media (0.5% glycerol) and used ScanLag to observe regrowth  
214 properties. Cultures grown in standard glycerol media had two subpopulations with a 10 hour  
215 difference in their TOA (**Fig S4**). This was consistent with the lag phase difference between the  
216 dim and lit subpopulations, confirming the presence of pre-existing persister cells in standard  
217 growth conditions. However, cultures starved of nutrients (0.005% glycerol) displayed a  
218 uniform delayed TOA (10 h), indicating the expansion of the persister cell population in nutrient  
219 starved conditions (**Fig S4**).

220 We also tested whether the dim cell numbers expand in response to low dose drug  
221 pressure, to investigate if this phenomenon could be attributed to generalized stress that was  
222 common to antibiotic exposure and nutrient starvation. Instead of transfer to PBS, the MSM-  
223 mEos2 cultures were mildly stressed with 0.1x MIC of INH. The INH pre-treatment only slightly  
224 increased the proportion of dim cells (2-fold increase shown in (**Fig S4**), but had a significant  
225 increase in the bulk tolerance to INH and RIF (**Fig S4b**). Interestingly, INH treatment led to  
226 higher variance in mEos2 fluorescence and shift in bulk population towards translational  
227 dormancy, as indicated by reduced mEos2 fluorescence intensity from the INH treated culture,  
228 compared to untreated (**Fig 3c**). Thus, the response to low dose INH response is distinct relative  
229 to nutrient starvation, which resulted in a clear bimodal distribution of fluorescence intensity  
230 and a dramatic increase in the dim cell subpopulation (**Fig 3d**). These data suggest that nutrient  
231 starvation and sub-MIC INH treatment increase antibiotic tolerance via distinct mechanisms.  
232 While the former induces an expansion of persister cells, the latter induces the formation of an  
233 intermediate adaptive state that affords antibiotic tolerance and perhaps better fitness in the  
234 presence of mild drug pressure. The bimodal distribution observed under nutrient starvation is  
235 characteristic of stochastic switching between two distinct phenotypes [20-22]. While the rate  
236 of stochastic switching under optimal growth conditions preferentially generates a fast growing,  
237 translationally active, and INH susceptible population (i.e., the lit cells), nutrient starvation  
238 shifts the dynamics of switching towards a slow growing, translationally dormant, and INH  
239 tolerant subpopulation (i.e., the dim persister cells) (**Fig 3d**).

#### 240 241 **Noise in expression of *vapC30*, *mazF* toxins, or *relA/spot* alarmone response induces the** 242 **stochastic formation of translationally dormant persisters**

243  
244 The observation that persisters pre-exist within isogenic cultures of mycobacteria suggests that  
245 they might be stochastically generated by noise in gene expression at the single-cell level as a  
246 fail-safe measure against unpredictable environmental stressors [23,24]. While this

247 phenomenon is well-known in other pathogenic and non-pathogenic bacteria, it has never  
248 before been implicated in formation of persisters in isogenic mycobacterial cultures, in absence  
249 of drug pressure [25,26]. Therefore, we profiled within individual cells of both dim and lit  
250 subpopulations, the transcript levels of 45 genes that were previously implicated in persister  
251 formation in *Mycobacterium* spp. and *E. coli* (**Table S1**). Single-cell gene expression profiling  
252 was performed with the Fluidigm Biomark 48x48 system per manufacturer instructions and  
253 assayed relative to single-cell genomic DNA signal [27]. Transcript abundance was also  
254 normalized to a spike-in RNA control to account for experimental noise.

255 Kernel PCA (kPCA) with RBF (radial basis function) kernels [28] was used to identify the  
256 groups among dim and lit subpopulation based on patterns in their persister genes expression  
257 and toxin:antitoxin ratio, since toxins induce persister formation when they are expressed at  
258 higher levels relative to their antitoxin counterpart [29]. The kPCA identified overlapping  
259 clusters demonstrating phenotypic uncertainty from expression of persister genes (**Fig 4a**).  
260 Unlike the lit cell subpopulation that had a unimodal spread, histograms plotted on the  
261 principal component with highest variance revealed three modes (transcriptional subgroups) in  
262 the dim cell subpopulation. As features are transformed onto a nonlinear state space in kPCA,  
263 their role in grouping is difficult to analyze. Therefore, we performed hierarchical clustering [30]  
264 of single-cell transcriptomes and reproduced the tripartite sub-grouping. Hierarchical clustering  
265 of cells with elevated *relA/spoT* transcript level and increased toxin to antitoxin ratio  
266 (*vapC30:B30* and *mazF:E*) stratified dim cells into three statistically significant clusters with at  
267 least four cells per cluster (approximately unbiased p-value >90 ) (**Fig 4b, S5**). Importantly, we  
268 did not detect similar population stratification through clustering analysis of lit cell  
269 transcriptomes (**Fig 4b, S5d**) mirroring the observations in kPCA analysis (**Fig 4a**). Further,  
270 whereas 80% of dim cells (20/25) were associated with elevated transcript levels of *relA/spoT*  
271 ( $\geq \log_2 3.5$ ), high *mazF:E* ratio ( $\geq \log_2 0.7$ ), or *vapC30:B30* ratio ( $\geq \log_2 0.7$ ), only 35% (9/26) of the  
272 lit cells had similar associations. These data suggest that high expression of RelA/SpoT and  
273 presence of free toxins VapC30, and MazF might be responsible for higher rate of persister  
274 formation in the dim cell subpopulation.

275 Next, we sought further evidence that one or some combination of the three  
276 mechanisms were indeed active in dim cell subpopulation and the likely mechanism(s) for  
277 persister formation. The VapC30 and MazF toxins belong to a family of type II toxin-antitoxin  
278 (TA) systems, implicated in mycobacterial dormancy and persistence [31-33]. Activation of the  
279 type II TA system results in toxin-mediated cleavage of specific mRNAs [34], tRNAs [35], or  
280 rRNAs [35,36] causing translational dormancy [37]. Since the specific target mRNAs and tRNAs  
281 of VapC30 and MazF were unknown, we analyzed 16S and 23S rRNA levels in dim and lit cells by  
282 qRT-PCR. We discovered that dim cells have lower rRNA content relative to lit cells; and we did  
283 not observe the same pattern with a transcript level of a highly expressed metabolic gene  
284 (phosphoglucosyltransferase, *pgi*) (**Fig 4c**). These data support the hypothesis that translational



285 dormancy in dim cells with high *vapC30:vapB30* and *mazF:mazE* ratios are a consequence of  
286 toxin-mediated cleavage of rRNA.

287 The RelA/SpoT protein, on the other hand, controls the so-called “alarmone response”,  
288 which acts to resist various stresses, including oxidative stress and nutrient starvation [38].  
289 Briefly, RelA/SpoT is bifunctional, capable of both synthesizing and hydrolyzing (p)ppGpp [39],  
290 an alarmone metabolite known to be required for long-term survival of mycobacteria during  
291 nutrient starvation [40-42], persistence of MTB in mice [43], and has been shown to induce the  
292 formation of persister cells in *E. coli* [37,44]. We discovered two lines of evidence to support  
293 the hypothesis that RelA/SpoT is predominantly in a synthase form within the dim cell  
294 subpopulation. First, significant number of cells (8/13) expressing high levels of *relA/spoT* are  
295 also associated with high *mazF:mazE* ratio, suggesting that the RelA/SpoT system might be  
296 acting through (p)ppGpp-mediated inactivation of the MazE antitoxin in these cells. Second, we  
297 observed only within dim cells a significant correlation ( $R= 0.89$ ,  $p\text{-value}=0.001$ ) between  
298 *relA/spoT* transcript levels and 6 alarmone response transcripts, all of which are implicated as  
299 drivers of dormancy (**Table S1**).

300

### 301 **Elimination of translationally dormant persisters reduces antibiotic tolerance and potentiates** 302 **drug activity**

303

304 Our data suggest that stochastic activation of at least three mechanisms may be responsible for  
305 generating translationally dormant persister cells in isogenic mycobacterial cultures growing  
306 under optimal conditions (**Fig 1**). We further hypothesize that the dynamics of these stochastic  
307 mechanisms shift in response to host-derived stress (*i.e.* nutrient starvation), leading to an  
308 increase in the proportion of persister cells (**Fig 3**). As such, blocking these mechanisms could  
309 potentially prevent the formation of both pre-existing and stress-induced persister cell  
310 populations, leading to improvement in drug treatment outcome. However, the multiplicity of  
311 mechanisms that could be deployed in a combinatorial scheme confounds this strategy (e.g.,  
312 MTB genome encodes >70 TA systems). Furthermore, we are yet to discover drugs that can  
313 specifically target TA systems or drugs that can kickstart translation. Notwithstanding these  
314 confounding issues, metabolic pathway analysis (see methods) from GSE29631, GSE69681, and  
315 GSE69983 GEO gene expression microarray datasets belonging to VapC30 over expression,  
316 RelA/SpoT knockout under nutrient starvation and nutrient starvation respectively suggests  
317 that the multiplicity of mechanisms for persister formation all converge into a physiologic state  
318 associated with reduced TCA cycle, which is consistent with the low ROS levels in cells of this  
319 subpopulation (**Fig 3b and 5a**). Therefore, we explored the use of L-cysteine to increase oxygen  
320 consumption in the translationally dormant persisters. L-cysteine was previously shown to  
321 convert MTB persister cells (selected in the presence of INH) to actively oxygen respiring cells  
322 and potentiate INH and RIF killing [45]. In accordance with their results, MSM cultures grown to

323 mid-log phase in presence of 4mM L-cysteine were assayed by Per-Sort and found to be  
324 completely devoid of dim cells (**Fig 5b**). Importantly, our data goes beyond the previous study  
325 by demonstrating that promoting oxidative metabolism can eradicate pre-existing persister  
326 cells that form independent of drug pressure. We also found that treatment with L-cysteine  
327 increased INH and RIF susceptibility of the bulk population by 100-fold, compared to nutrient  
328 starvation conditions (**Fig 5c**). Nutrient starvation conditions, which activate RelA/SpoT induced  
329 alarmone response [46] act in opposition to L-cysteine by increasing the proportion of dim cells  
330 (**Fig 5b**), and thus increasing drug tolerance of the entire population (**Fig 5c**) and MDK<sub>95</sub>  
331 (minimum duration for killing 95% of bacterial cells) of RIF (**Fig 5d**). Furthermore, L-cysteine  
332 significantly reduced the MDK<sub>95</sub> of RIF in nutrient starved cultures (**Fig 5d**). Ultimately, these  
333 results demonstrate the potential of strategies to eliminate pre-existing persisters to improve  
334 the treatment of TB.

335

## 336 **Conclusions**

337

338 Numerous studies have revealed cell-to-cell variability in organisms from all domains of  
339 life –unicellular to multicellular. Phenotypic variation confers fitness advantage to pathogens  
340 such as MTB, which routinely experience varying and hostile environments within the host.  
341 Through cell-to-cell variability, the population is able to prepare for a probable new  
342 environment by harbouring a subpopulation that is pre-adapted to that environment.  
343 Unfortunately, this evolutionary strategy, called bet-hedging, impedes the ability to effectively  
344 treat TB due to the presence of drug tolerant persister cells. In this study, we developed a  
345 method to identify drug-tolerant persisters in MSM culture. The characterization of such  
346 persisters could facilitate the means to shorten TB treatment.

347 Using Per-Sort we isolated a translationally dormant subpopulation based on the  
348 absence of mEos2 fluorescence after induction of transcriptional overexpression of the reporter  
349 with ATc. In addition to INH and RIF tolerance, this “dim” persister subpopulation was  
350 demonstrated to be small in size, have reduced oxygen metabolism and a longer lag phase  
351 upon regrowth. Such properties are consistent with that of small morphotype resting cells  
352 (SMRCs), formed during mild nutrient starvation [16]. Here we report these cells actually pre-  
353 exist in low numbers in a isogenic MSM culture growing under optimal low stress conditions.  
354 We believe these cells, and likely other phenotypically heterogeneous subpopulations, are  
355 generated and maintained to withstand complex and unpredictable environmental stress.

356 Upon nutrient starvation, we discovered there is a significant increase in the proportion  
357 of translationally dormant persister cells and a clear bimodal distribution of dim and lit cells (Fig  
358 3a). These results are indicative of a shift in dynamics of stochastic phenotypic switching that  
359 favors expansion of the subpopulation in a translationally dormant phenotype in nutrient  
360 starved conditions. This begs the question of what is being stochastically altered in less than 1%

361 of the population and influencing the translational state of this mycobacterial subpopulation.  
362 Most often diversity is generated within a clonal population by stochastic processes that  
363 introduce noise in gene expression at the single-cell level [47-49]. We have overcome the  
364 challenge of characterizing persisters at single cell resolution by sorting them and not by killing  
365 the susceptible cells with antibiotics. This technological advancement has overcome the  
366 confounding issue that the antibiotic treatment itself might induce persister cell formation,  
367 which we demonstrate with 0.1X MIC INH treatment (**Fig 3**). Further, our technology allows  
368 comparative analysis of persister cells *and* actively growing drug susceptible cells from the  
369 *same* culture. Because of these novel capabilities of Per-Sort, we were able to quantify  
370 transcript abundance of 45 genes associated with persister formation and drug tolerance in 45  
371 single cells from both dim and lit subpopulations. Expression analysis revealed that stochastic  
372 activation of TA systems and dual-functionality of RelA/SpoT are the basis of translationally  
373 dormant persister formation in MSM cultures. These results reinforce the hypothesis that there  
374 are multiple pathways to become a persister cell and reveal the complex and combinatorial  
375 schemes used by mycobacteria to generate heterogeneous subpopulations.

376 Among the dim cells, we found that high expression of toxin *mazF* was also associated  
377 with high *relA/spoT* expression. We suspect that MazEF can be activated by the alarmone  
378 response, elicited by RelA/SpoT synthesis of (p)ppGpp, in a manner similar to the well-studied  
379 *hipAB* of *E. coli* persisters [50]. In contrast, the single-cell expression data suggest that VapC30  
380 can act to induce persister formation in an alarmone-independent mechanism. This supports a  
381 recent study demonstrating that a *relA/spoT* knockout mutant of MSM, with reduced alarmone  
382 response, still formed persisters against INH and ciprofloxacin at levels similar to wildtype [51].  
383 Indicating multiple mechanisms of persister formation exist in mycobacteria, some of which are  
384 independent of RelA/SpoT, and might be controlled by VapC30 activation. While MSM has a  
385 single VapBC-type TA system, MTB has 70 copies of VapBC, indicating the pathogen has evolved  
386 to increase phenotypic diversity and bet-hedging for survival in the host environment. Much  
387 work is still needed to understand how and when these mechanisms are activated, and  
388 whether the resulting subpopulations have distinct or generalized drug tolerance.

389 In addition to posttranscriptional cleavage of rRNA and reducing translation in a  
390 subpopulation of cells, activation of TA systems and the alarmone response has been shown to  
391 decrease oxidative metabolism in persisters [34,52]. Similarly, we demonstrated lower ROS  
392 levels in the dim cells compared to lit cells, indicating reduced oxygen consumption in the  
393 translationally dormant persister cells. As such, both translation and oxidative metabolism are  
394 processes that could be targeted to modulate this subpopulation. We confirmed by  
395 demonstrating that addition of L-cysteine, which is known to activate cellular oxidative  
396 metabolism, dramatically reduced the proportion of translationally dormant persisters in  
397 actively growing MSM cultures. As such, when used with a drug, L-cysteine potentiates faster  
398 drug killing by increasing the oxidative metabolism of the pre-existing persister cell population

399 and thereby increasing their drug susceptibility. However, L-cysteine is a metabolite and cannot  
400 be used for treatment *in vivo*. Therefore, other strategies that activate oxidative pathways  
401 similar to L-cysteine (i.e. cis-2-decenoic acid [53] or superoxide-producing nanoparticles [54]) or  
402 activate translation should be tested. Alternatively, our study also proposes inhibition of  
403 VapC30 and RelA/SpoT synthase activity (such as (p)ppGpp analogs like relacin [55]) would  
404 block persists from forming *a priori*. This study highlights how mechanistic knowledge will  
405 enable targeted strategies to eliminate detrimental persisters, thereby shortening the course of  
406 treatment and preventing the emergence of resistance.

407

#### 408 **Materials and methods-**

409

410 Bacterial growth and MSM-mEos2 strain development: *M. smegmatis* MC155 strains (MSM)  
411 were obtained from ATCC and grown in 7H9 broth medium (Difco) with 0.2% glycerol, 0.05%  
412 tween, and 10% ADC enrichment (BD biosciences). pSTKi-mEos2 plasmid were constructed from  
413 pSTKi plasmid [56] , and pRSETa mEos2 plasmid [57]. Synthetic oligo with translation initiation  
414 signal (mycoSD) was used to amplify mEos2 from pRSETa mEos2 plasmid, amplified fragment  
415 was inserted into the pSTKi plasmid with restriction ligation at BamH1 and EcoR1 sites. pSTKi-  
416 mEos2 transcript was electroporated into the electrocompetent MSM cultures, transformed  
417 colonies were selected on 7H10 plates with 30 µg/ml kanamycin (KAN). MSM-mEos2 cells were  
418 cultured in 7H9 media with 30 µg/ml KAN.

419

420 Development of per-SORT: per-SORT was developed in BD FACS Influx, 70 micron tip and sheath  
421 fluid from BD bioscience was used in sorting and FACS analysis. Fluorescence beads (1, 3.5  
422 micron green fluorescence, and Accudrop) from BD biosciences was used to calibrate the  
423 instrument for laser alignment, compensation, and cell sorting. Propidium iodide (PI) stain  
424 (SigmaAldridge, 5µl/1ml) was used to stain dead cell. Heat killed cells (incubated at 70° – 80° C  
425 for 5 mins) was used to prepare dead cell control for PI stain. MSM cells with pCHERRY3  
426 plasmid [58] (MSM-mCherry) was used to optimize single cell mycobacterium sorting. MSM-  
427 mEos2 (KAN resistant) cultures induced with 25ng/ml ATc and MSM-mCherry (Hygromycin  
428 resistant) were mixed in equal proportions. Single cell sorting efficiency was determined by  
429 plating sorted cells on 7H10 plates with KAN and HYG. Gates for sorting dim and lit cells of ATc  
430 induced MSM-mEos2 strains were determined using uninduced MSM-mEos2 strains stained  
431 with PI. FACS data was analyzed in FlowJo ver. 10 software.

432

433 Antimicrobial tolerance assay: Minimum inhibitory concentrations (MIC) of the MSM-mEOS2  
434 strains were determined with disk diffusion assay [59] . Cultures (bulk, per-Sorted) were  
435 incubated in 7H9 media containing desired MIC concentrations of INH and RIF. Drug treated  
436 bacteria were washed with or diluted (1:100) in 7H9 media and plated (100 µl) or spotted (5 µl)  
437 on 7H10 media with 30 µg/ml KAN at time points 0, 8, 12, 16, 20, and 24 hours after incubation.  
438 Percentage survival was calculated with respect to 0 hours.

439

440 Single cell persister gene expression and analysis: Fluidigm Biomark system with 48x48 plates  
441 were used for this analysis. Single dim and lit cells were per-Sorted into 96 well plates with

442 VILO™ reaction mix (5x), SUPERase (Invitrogen™), and 10% NP40 in an pre-noted random  
443 order to avoid sampling bias. Sorted plates were spun down and freeze-thawed 3 times on dry  
444 ice to rupture cells. Assay for non-transcribed genomic DNA (Table S1) was used to determine  
445 the rupture efficiency. Reverse transcription (RT) was performed on freeze thawed cells with  
446 VILO cDNA preparation mixture, T4-Gene32 protein, and random hexamer primers. RNA spike-  
447 in (ECC2\_SpikeIn RNA, 10 pM) was included in the RT master mix. cDNA of the genes of interest  
448 (Table S1) was pre-amplified with TaqMan® PreAmp master mix (Invitrogen™) and equimolar  
449 mixture of forward and reverse strand primers designed for the genes of interest (Table S2).  
450 Primers were removed with Exonuclease I (Invitrogen™). Primers sets used for  
451 preamplification (Table S2) were primed into the 48x48 Biomark assay plates. Quantitative PCR  
452 assay with Biomark prescribed protocol was run on diluted, pre-amplified Exo 1 treated cDNA  
453 with Sso Fast EvaGreen Supermix (Bio-Rad laboratories). Quality control for determining,  
454 sorting, cell lysis, and cDNA preparation was performed by comparing the CT values of genomic  
455 DNA control and spike-in control in all the cells. Expression levels of genes was measured as  $\delta$ CT  
456 in individual cells with reference to genomic DNA control (expected to result from 1 copy of  
457 genomic DNA), less than or equal expression (of genomic DNA control) was considered as zero  
458 expression and assays with CT >45 were flagged as missing values.  $\delta$ CT values for each cells  
459 were corrected by adding or subtracting the deviation from median  $\delta$ CT of spike-in control for a  
460 particular cell. Hierarchical clustering was performed with Seaborn package of Python and  
461 PVclust package of R.

462  
463 Pathway analysis: Gene expression data sets of VapC overexpression (GSE29631), RelA/SpoT  
464 knockout in nutrient starvation (growth in PBS, GSE69681), and nutrient starvation (growth in  
465 PBS, GSE69983) was obtained from GEO database and analysed with Cyber-T tool [60] to  
466 identify differentially expressed genes (DEG) in the respective conditions. DEG was mapped  
467 onto the central carbon metabolism of MSM with the gene annotations obtained from KEGG  
468 pathways. DEGs in GSE69983 which significantly deviated from GSE69681 were considered to  
469 be the changes caused by RelA/SpoT induced alarmone response.

470  
471  
472  
473

474 **Acknowledgements:** We thank members of the Baliga lab for critical discussions; Amardeep  
475 Kaur for her technical expertise; Tim Petersen and Monica Orellana for help with FACS; Seattle  
476 Children’s Research Institute, particularly David Sherman, Christoph Grundner and Weldon  
477 DeBusk for BSL-3 access and help. Funding was provided by the National Institute of Allergy and  
478 Infectious Diseases of the National Institutes of Health [R01 AI128215] and [U19 AI10676, U19  
479 AI135976]; and National Science Foundation [1518261, 1565166, and 1616955].

480  
481 **Author contributions:** V.S. designed research, performed research, analyzed data and wrote  
482 the paper. M.A. performed computational analyses. E.J.R.P and N.S.B. designed research,  
483 analyzed data, and wrote the paper.

484  
485 **Competing interests:** The authors declare no competing financial interests.  
486

## 487 References

- 488 1. Sarathy JP, Via LE, Weiner D, Blanc L, Boshoff H, Eugenin EA, Barry CE, 3rd, Dartois VA.  
489 Extreme Drug Tolerance of Mycobacterium tuberculosis in Caseum. *Antimicrob Agents*  
490 *Chemother.* 2018;62(2). doi: 10.1128/AAC.02266-17. PubMed PMID: 29203492; PMCID:  
491 PMC5786764.
- 492 2. Connolly LE, Edelstein PH, Ramakrishnan L. Why is long-term therapy required to cure  
493 tuberculosis? *PLoS Med.* 2007;4(3):e120. doi: 10.1371/journal.pmed.0040120. PubMed  
494 PMID: 17388672; PMCID: PMC1831743.
- 495 3. Cohen NR, Lobritz MA, Collins JJ. Microbial persistence and the road to drug resistance.  
496 *Cell Host Microbe.* 2013;13(6):632-42. doi: 10.1016/j.chom.2013.05.009. PubMed PMID:  
497 23768488; PMCID: PMC3695397.
- 498 4. Levin-Reisman I, Ronin I, Gefen O, Braniss I, Shoshitashvili N, Balaban NQ. Antibiotic tolerance  
499 facilitates the evolution of resistance. *Science.* 2017;355(6327):826-30. doi:  
500 10.1126/science.aaj2191. PubMed PMID: 28183996.
- 501 5. Amato SM, Fazen CH, Henry TC, Mok WW, Orman MA, Sandvik EL, Volzing KG,  
502 Brynildsen MP. The role of metabolism in bacterial persistence. *Front Microbiol.*  
503 2014;5:70. doi: 10.3389/fmicb.2014.00070. PubMed PMID: 24624123; PMCID:  
504 PMC3939429.
- 505 6. Helaine S, Cheverton AM, Watson KG, Faure LM, Matthews SA, Holden DW.  
506 Internalization of Salmonella by macrophages induces formation of nonreplicating  
507 persisters. *Science.* 2014;343(6167):204-8. doi: 10.1126/science.1244705. PubMed  
508 PMID: 24408438.
- 509 7. Orman MA, Henry TC, DeCoste CJ, Brynildsen MP. Analyzing Persister Physiology with  
510 Fluorescence-Activated Cell Sorting. *Methods Mol Biol.* 2016;1333:83-100. doi:  
511 10.1007/978-1-4939-2854-5\_8. PubMed PMID: 26468102; PMCID: PMC4908830.
- 512 8. Manina G, Dhar N, McKinney JD. Stress and host immunity amplify Mycobacterium  
513 tuberculosis phenotypic heterogeneity and induce nongrowing metabolically active  
514 forms. *Cell Host Microbe.* 2015;17(1):32-46. doi: 10.1016/j.chom.2014.11.016. PubMed  
515 PMID: 25543231.

- 516 9. Jain P, Weinrick BC, Kalivoda EJ, Yang H, Munsamy V, Vilcheze C, Weisbrod TR, Larsen  
517 MH, O'Donnell MR, Pym A, Jacobs WR, Jr. Dual-Reporter Mycobacteriophages  
518 (Phi2DRMs) Reveal Preexisting Mycobacterium tuberculosis Persistent Cells in Human  
519 Sputum. *MBio*. 2016;7(5). doi: 10.1128/mBio.01023-16. PubMed PMID: 27795387;  
520 PMCID: PMC5080378.
- 521 10. Cho J, Rogers J, Kearns M, Leslie M, Hartson SD, Wilson KS. Escherichia coli persister  
522 cells suppress translation by selectively disassembling and degrading their ribosomes.  
523 *Mol Microbiol*. 2015;95(2):352-64. doi: 10.1111/mmi.12884. PubMed PMID: 25425348.
- 524 11. Shah D, Zhang Z, Khodursky A, Kaldalu N, Kurg K, Lewis K. Persisters: a distinct  
525 physiological state of E. coli. *BMC Microbiol*. 2006;6:53. doi: 10.1186/1471-2180-6-53.  
526 PubMed PMID: 16768798; PMCID: PMC1557402.
- 527 12. McKinney SA, Murphy CS, Hazelwood KL, Davidson MW, Looger LL. A bright and  
528 photostable photoconvertible fluorescent protein. *Nat Methods*. 2009;6(2):131-3. doi:  
529 10.1038/nmeth.1296. PubMed PMID: 19169260; PMCID: PMC2745648.
- 530 13. Carroll P, Schreuder LJ, Muwanguzi-Karugaba J, Wiles S, Robertson BD, Ripoll J, Ward TH,  
531 Bancroft GJ, Schaible UE, Parish T. Sensitive detection of gene expression in  
532 mycobacteria under replicating and non-replicating conditions using optimized far-red  
533 reporters. *PLoS One*. 2010;5(3):e9823. doi: 10.1371/journal.pone.0009823. PubMed  
534 PMID: 20352111; PMCID: PMC2843721.
- 535 14. Tracy BP, Gaida SM, Papoutsakis ET. Flow cytometry for bacteria: enabling metabolic  
536 engineering, synthetic biology and the elucidation of complex phenotypes. *Curr Opin  
537 Biotechnol*. 2010;21(1):85-99. doi: 10.1016/j.copbio.2010.02.006. PubMed PMID:  
538 20206495.
- 539 15. Wakamoto Y, Dhar N, Chait R, Schneider K, Signorino-Gelo F, Leibler S, McKinney JD.  
540 Dynamic persistence of antibiotic-stressed mycobacteria. *Science*. 2013;339(6115):91-5.  
541 doi: 10.1126/science.1229858. PubMed PMID: 23288538.
- 542 16. Wu ML, Gengenbacher M, Dick T. Mild Nutrient Starvation Triggers the Development of  
543 a Small-Cell Survival Morphotype in Mycobacteria. *Front Microbiol*. 2016;7:947. doi:  
544 10.3389/fmicb.2016.00947. PubMed PMID: 27379076; PMCID: PMC4909757.
- 545 17. Kohanski MA, Dwyer DJ, Hayete B, Lawrence CA, Collins JJ. A common mechanism of  
546 cellular death induced by bactericidal antibiotics. *Cell*. 2007;130(5):797-810. doi:  
547 10.1016/j.cell.2007.06.049. PubMed PMID: 17803904.
- 548 18. Levin-Reisman I, Fridman O, Balaban NQ. ScanLag: high-throughput quantification of  
549 colony growth and lag time. *J Vis Exp*. 2014(89). doi: 10.3791/51456. PubMed PMID:  
550 25077667; PMCID: PMC4215631.
- 551 19. Fridman O, Goldberg A, Ronin I, Shoresh N, Balaban NQ. Optimization of lag time  
552 underlies antibiotic tolerance in evolved bacterial populations. *Nature*.  
553 2014;513(7518):418-21. doi: 10.1038/nature13469. PubMed PMID: 25043002.
- 554 20. Kussell E, Leibler S. Phenotypic diversity, population growth, and information in  
555 fluctuating environments. *Science*. 2005;309(5743):2075-8. doi:  
556 10.1126/science.1114383. PubMed PMID: 16123265.
- 557 21. Acar M, Mettetal JT, van Oudenaarden A. Stochastic switching as a survival strategy in  
558 fluctuating environments. *Nat Genet*. 2008;40(4):471-5. doi: 10.1038/ng.110. PubMed  
559 PMID: 18362885.

- 560 22. Kotte O, Volkmer B, Radzikowski JL, Heinemann M. Phenotypic bistability in *Escherichia*  
561 *coli*'s central carbon metabolism. *Mol Syst Biol.* 2014;10:736. doi:  
562 10.15252/msb.20135022. PubMed PMID: 24987115; PMCID: PMC4299493.
- 563 23. Eldar A, Elowitz MB. Functional roles for noise in genetic circuits. *Nature.*  
564 2010;467(7312):167-73. doi: 10.1038/nature09326. PubMed PMID: 20829787; PMCID:  
565 PMC4100692.
- 566 24. Choi PJ, Cai L, Frieda K, Xie XS. A stochastic single-molecule event triggers phenotype  
567 switching of a bacterial cell. *Science.* 2008;322(5900):442-6. doi:  
568 10.1126/science.1161427. PubMed PMID: 18927393; PMCID: PMC2819113.
- 569 25. Henry TC, Brynildsen MP. Development of Persister-FACSeq: a method to massively  
570 parallelize quantification of persister physiology and its heterogeneity. *Sci Rep.*  
571 2016;6:25100. doi: 10.1038/srep25100. PubMed PMID: 27142337; PMCID:  
572 PMC4855238.
- 573 26. Solopova A, van Gestel J, Weissing FJ, Bachmann H, Teusink B, Kok J, Kuipers OP. Bet-  
574 hedging during bacterial diauxic shift. *Proc Natl Acad Sci U S A.* 2014;111(20):7427-32.  
575 doi: 10.1073/pnas.1320063111. PubMed PMID: 24799698; PMCID: PMC4034238.
- 576 27. Wang J, Chen L, Chen Z, Zhang W. RNA-seq based transcriptomic analysis of single  
577 bacterial cells. *Integr Biol (Camb).* 2015;7(11):1466-76. doi: 10.1039/c5ib00191a.  
578 PubMed PMID: 26331465.
- 579 28. Wang B, Zhu J, Pierson E, Ramazzotti D, Batzoglou S. Visualization and analysis of single-  
580 cell RNA-seq data by kernel-based similarity learning. *Nat Methods.* 2017;14(4):414-6.  
581 doi: 10.1038/nmeth.4207. PubMed PMID: 28263960.
- 582 29. Ahidjo BA, Kuhnert D, McKenzie JL, Machowski EE, Gordhan BG, Arcus V, Abrahams GL,  
583 Mizrahi V. VapC toxins from *Mycobacterium tuberculosis* are ribonucleases that  
584 differentially inhibit growth and are neutralized by cognate VapB antitoxins. *PLoS One.*  
585 2011;6(6):e21738. doi: 10.1371/journal.pone.0021738. PubMed PMID: 21738782;  
586 PMCID: PMC3126847.
- 587 30. Suzuki R, Shimodaira H. Pvcust: an R package for assessing the uncertainty in  
588 hierarchical clustering. *Bioinformatics.* 2006;22(12):1540-2. doi:  
589 10.1093/bioinformatics/btl117. PubMed PMID: 16595560.
- 590 31. Ramage HR, Connolly LE, Cox JS. Comprehensive functional analysis of *Mycobacterium*  
591 *tuberculosis* toxin-antitoxin systems: implications for pathogenesis, stress responses,  
592 and evolution. *PLoS Genet.* 2009;5(12):e1000767. doi: 10.1371/journal.pgen.1000767.  
593 PubMed PMID: 20011113; PMCID: PMC2781298.
- 594 32. Sala A, Bordes P, Genevaux P. Multiple toxin-antitoxin systems in *Mycobacterium*  
595 *tuberculosis*. *Toxins (Basel).* 2014;6(3):1002-20. doi: 10.3390/toxins6031002. PubMed  
596 PMID: 24662523; PMCID: PMC3968373.
- 597 33. Keren I, Minami S, Rubin E, Lewis K. Characterization and transcriptome analysis of  
598 *Mycobacterium tuberculosis* persisters. *MBio.* 2011;2(3):e00100-11. doi:  
599 10.1128/mBio.00100-11. PubMed PMID: 21673191; PMCID: PMC3119538.
- 600 34. McKenzie JL, Robson J, Berney M, Smith TC, Ruthe A, Gardner PP, Arcus VL, Cook GM. A  
601 VapBC toxin-antitoxin module is a posttranscriptional regulator of metabolic flux in  
602 mycobacteria. *J Bacteriol.* 2012;194(9):2189-204. doi: 10.1128/JB.06790-11. PubMed  
603 PMID: 22366418; PMCID: PMC3347065.



- 604 35. Winther KS, Gerdes K. Regulation of enteric vapBC transcription: induction by VapC  
605 toxin dimer-breaking. *Nucleic Acids Res.* 2012;40(10):4347-57. doi: 10.1093/nar/gks029.  
606 PubMed PMID: 22287572; PMCID: PMC3378870.
- 607 36. Schifano JM, Edifor R, Sharp JD, Ouyang M, Konkimalla A, Husson RN, Woychik NA.  
608 Mycobacterial toxin MazF-mt6 inhibits translation through cleavage of 23S rRNA at the  
609 ribosomal A site. *Proc Natl Acad Sci U S A.* 2013;110(21):8501-6. doi:  
610 10.1073/pnas.1222031110. PubMed PMID: 23650345; PMCID: PMC3666664.
- 611 37. Germain E, Roghanian M, Gerdes K, Maisonneuve E. Stochastic induction of persister  
612 cells by HipA through (p)ppGpp-mediated activation of mRNA endonucleases. *Proc Natl*  
613 *Acad Sci U S A.* 2015;112(16):5171-6. doi: 10.1073/pnas.1423536112. PubMed PMID:  
614 25848049; PMCID: PMC4413331.
- 615 38. Haseltine WA, Block R. Synthesis of guanosine tetra- and pentaphosphate requires the  
616 presence of a codon-specific, uncharged transfer ribonucleic acid in the acceptor site of  
617 ribosomes. *Proc Natl Acad Sci U S A.* 1973;70(5):1564-8. PubMed PMID: 4576025;  
618 PMCID: PMC433543.
- 619 39. Weiss LA, Stallings CL. Essential roles for *Mycobacterium tuberculosis* Rel beyond the  
620 production of (p)ppGpp. *J Bacteriol.* 2013;195(24):5629-38. doi: 10.1128/JB.00759-13.  
621 PubMed PMID: 24123821; PMCID: PMC3889611.
- 622 40. Klinkenberg LG, Lee JH, Bishai WR, Karakousis PC. The stringent response is required for  
623 full virulence of *Mycobacterium tuberculosis* in guinea pigs. *J Infect Dis.*  
624 2010;202(9):1397-404. doi: 10.1086/656524. PubMed PMID: 20863231; PMCID:  
625 PMC2949470.
- 626 41. Chatterji D, Ojha AK. Revisiting the stringent response, ppGpp and starvation signaling.  
627 *Curr Opin Microbiol.* 2001;4(2):160-5. PubMed PMID: 11282471.
- 628 42. Kriel A, Bittner AN, Kim SH, Liu K, Tehranchi AK, Zou WY, Rendon S, Chen R, Tu BP, Wang  
629 JD. Direct regulation of GTP homeostasis by (p)ppGpp: a critical component of viability  
630 and stress resistance. *Mol Cell.* 2012;48(2):231-41. doi: 10.1016/j.molcel.2012.08.009.  
631 PubMed PMID: 22981860; PMCID: PMC3483369.
- 632 43. Dahl JL, Kraus CN, Boshoff HI, Doan B, Foley K, Avarbock D, Kaplan G, Mizrahi V, Rubin H,  
633 Barry CE, 3rd. The role of RelMtb-mediated adaptation to stationary phase in long-term  
634 persistence of *Mycobacterium tuberculosis* in mice. *Proc Natl Acad Sci U S A.*  
635 2003;100(17):10026-31. doi: 10.1073/pnas.1631248100. PubMed PMID: 12897239;  
636 PMCID: PMC187750.
- 637 44. Harms A, Fino C, Sorensen MA, Semsey S, Gerdes K. Prophages and Growth Dynamics  
638 Confound Experimental Results with Antibiotic-Tolerant Persister Cells. *MBio.* 2017;8(6).  
639 doi: 10.1128 /mBio.01964-17. PubMed PMID: 29233898; PMCID: PMC5727415.
- 640 45. Vilcheze C, Hartman T, Weinrick B, Jain P, Weisbrod TR, Leung LW, Freundlich JS, Jacobs  
641 WR, Jr. Enhanced respiration prevents drug tolerance and drug resistance in  
642 *Mycobacterium tuberculosis*. *Proc Natl Acad Sci U S A.* 2017;114(17):4495-500. doi:  
643 10.1073/pnas.1704376114. PubMed PMID: 28396391; PMCID: PMC5410800.
- 644 46. Wu ML, Gengenbacher M, Chung JC, Chen SL, Mollenkopf HJ, Kaufmann SH, Dick T.  
645 Developmental transcriptome of resting cell formation in *Mycobacterium smegmatis*.  
646 *BMC Genomics.* 2016;17(1):837. doi: 10.1186/s12864-016-3190-4. PubMed PMID:  
647 27784279; PMCID: PMC5081680.

- 648 47. Raj A, van Oudenaarden A. Nature, nurture, or chance: stochastic gene expression and  
649 its consequences. *Cell*. 2008;135(2):216-26. doi: 10.1016/j.cell.2008.09.050. PubMed  
650 PMID: 18957198; PMCID: PMC3118044.
- 651 48. Avery SV. Microbial cell individuality and the underlying sources of heterogeneity. *Nat*  
652 *Rev Microbiol*. 2006;4(8):577-87. doi: 10.1038/nrmicro1460. PubMed PMID: 16845428.
- 653 49. Dhar N, McKinney JD. Microbial phenotypic heterogeneity and antibiotic tolerance. *Curr*  
654 *Opin Microbiol*. 2007;10(1):30-8. doi: 10.1016/j.mib.2006.12.007. PubMed PMID:  
655 17215163.
- 656 50. Korch SB, Henderson TA, Hill TM. Characterization of the hipA7 allele of *Escherichia coli*  
657 and evidence that high persistence is governed by (p)ppGpp synthesis. *Mol Microbiol*.  
658 2003;50(4):1199-213. PubMed PMID: 14622409.
- 659 51. Bhaskar A, De Piano C, Gelman E, McKinney JD, Dhar N. Elucidating the role of (p)ppGpp  
660 in mycobacterial persistence against antibiotics. *IUBMB Life*. 2018;70(9):836-44. doi:  
661 10.1002/iub.1888. PubMed PMID: 30092117.
- 662 52. Verstraeten N, Knapen WJ, Fauvart M, Michiels J. Membrane depolarization-triggered  
663 responsive diversification leads to antibiotic tolerance. *Microb Cell*. 2015;2(8):299-301.  
664 doi: 10.15698/mic2015.08.220. PubMed PMID: 28357305; PMCID: PMC5349102.
- 665 53. Marques CN, Morozov A, Planzos P, Zelaya HM. The fatty acid signaling molecule cis-2-  
666 decenoic acid increases metabolic activity and reverts persister cells to an antimicrobial-  
667 susceptible state. *Appl Environ Microbiol*. 2014;80(22):6976-91. doi:  
668 10.1128/AEM.01576-14. PubMed PMID: 25192989; PMCID: PMC4249009.
- 669 54. Courtney CM, Goodman SM, Nagy TA, Levy M, Bhusal P, Madinger NE, Detweiler CS,  
670 Nagpal P, Chatterjee A. Potentiating antibiotics in drug-resistant clinical isolates via  
671 stimuli-activated superoxide generation. *Sci Adv*. 2017;3(10):e1701776. doi:  
672 10.1126/sciadv.1701776. PubMed PMID: 28983513; PMCID: PMC5627983.
- 673 55. Wexselblatt E, Oppenheimer-Shaanan Y, Kaspy I, London N, Schueler-Furman O, Yavin E,  
674 Glaser G, Katzhendler J, Ben-Yehuda S. Relacin, a novel antibacterial agent targeting the  
675 Stringent Response. *PLoS Pathog*. 2012;8(9):e1002925. doi:  
676 10.1371/journal.ppat.1002925. PubMed PMID: 23028324; PMCID: PMC3447753.
- 677
- 678 56. Parikh A, Kumar D, Chawla Y, Kurthkoti K, Khan S, Varshney U, et al. Development of a New  
679 Generation of Vectors for Gene Expression, Gene Replacement, and Protein-Protein  
680 Interaction Studies in Mycobacteria. *Appl Environ Microbiol*. 2013 Mar;79(5):1718-29.
- 681 57. McKinney SA, Murphy CS, Hazelwood KL, Davidson MW, Looger LL. A bright and  
682 photostable photoconvertible fluorescent protein for fusion tags. *Nat Methods*. 2009  
683 Feb;6(2):131-3.
- 684 58. Carroll P, Schreuder LJ, Muwanguzi-Karugaba J, Wiles S, Robertson BD, Ripoll J, et al.  
685 Sensitive Detection of Gene Expression in Mycobacteria under Replicating and Non-  
686 Replicating Conditions Using Optimized Far-Red Reporters. *PLOS ONE*. 2010 Mar  
687 23;5(3):e9823.

688 59. Bonev B, Hooper J, Parisot J. Principles of assessing bacterial susceptibility to antibiotics  
689 using the agar diffusion method. *J Antimicrob Chemother.* 2008 Jun 1;61(6):1295–301.

690 60. Baldi P, Long AD. A Bayesian framework for the analysis of microarray expression data:  
691 regularized t -test and statistical inferences of gene changes. *Bioinforma Oxf Engl.* 2001  
692 Jun;17(6):509–19.

693

694

695

696 **Figures and tables:**

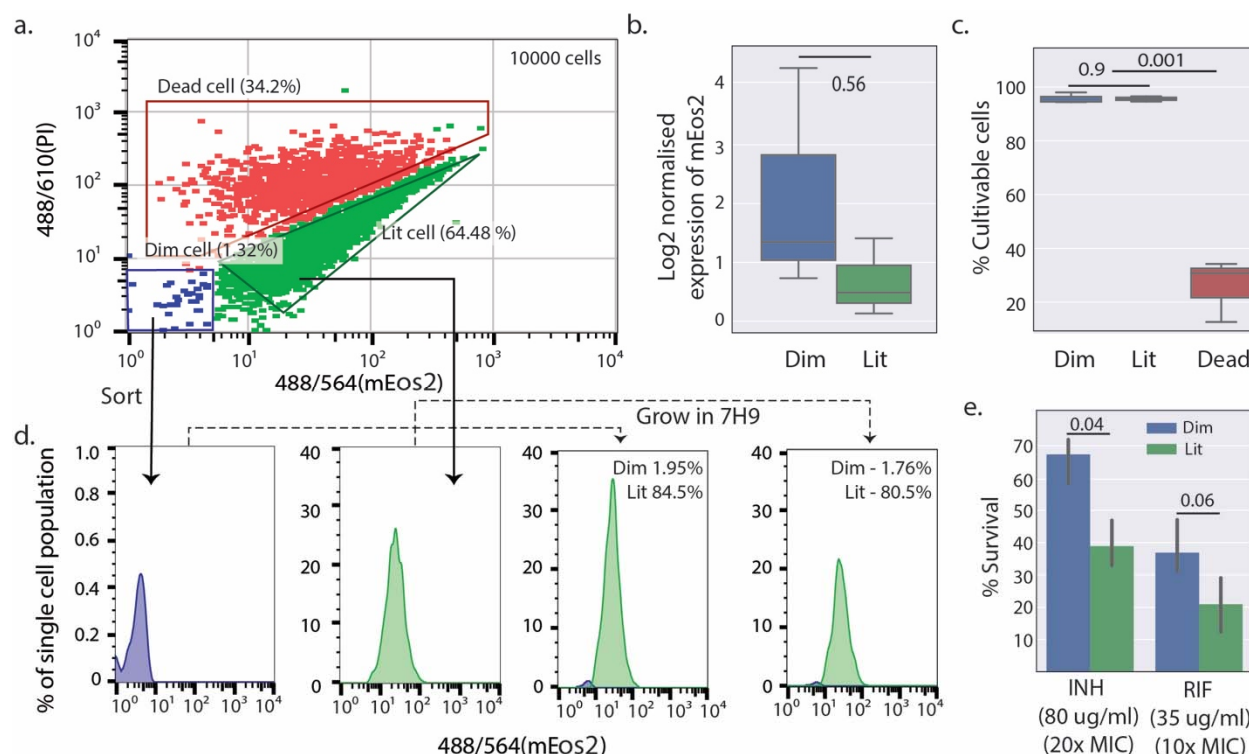

697  
 698 **Figure 1:** Preexisting translationally dormant population of *Mycobacterium* culture are  
 699 persisters. (a) Fluorescence intensity of mEos2 protein in MSM-mEos2 strain induced with 25  
 700 ng/ $\mu$ l of ATc. Population structure was observed in FACS after 12 hours of induction at OD 1.0.  
 701 Populations are colored and annotated based on the FACS gates described in Fig S1b. The  
 702 polygons in the plot are the gates from which the fractions were sorted for analyses described  
 703 in this study. (b) mEos2 transcript levels derived from  $\Delta\Delta$ Ct values obtained by qRT-PCR, values  
 704 were subtracted from genomic DNA signal and normalized to control gene (see materials and  
 705 methods for details). (c) Cultivability of live cells subpopulations (lit and dim) compared to dead  
 706 cells. Cultivability was measured as ratio of number of cell forming units (CFU) and number of  
 707 cells sorted. (d) Dim and lit cells (1,000 per) were collected from gates marked in Fig 1a. Sorted  
 708 subpopulations were regrown in 7H9 media until OD<sub>600</sub> reached 0.6 and then induced with 25  
 709 ng/ $\mu$ l of ATc. Induced cultures were observed in FACS (dotted line) and dim and lit percentages  
 710 were determined from gates described in Fig 1a. (e) FACS sorted dim and lit cells were treated  
 711 with 20x MIC INH and 10x MIC RIF for 8 hours before they were washed and plated onto 7H10  
 712 plates to determine percentage survival (difference in CFUs compared to 0 hour incubation).  
 713

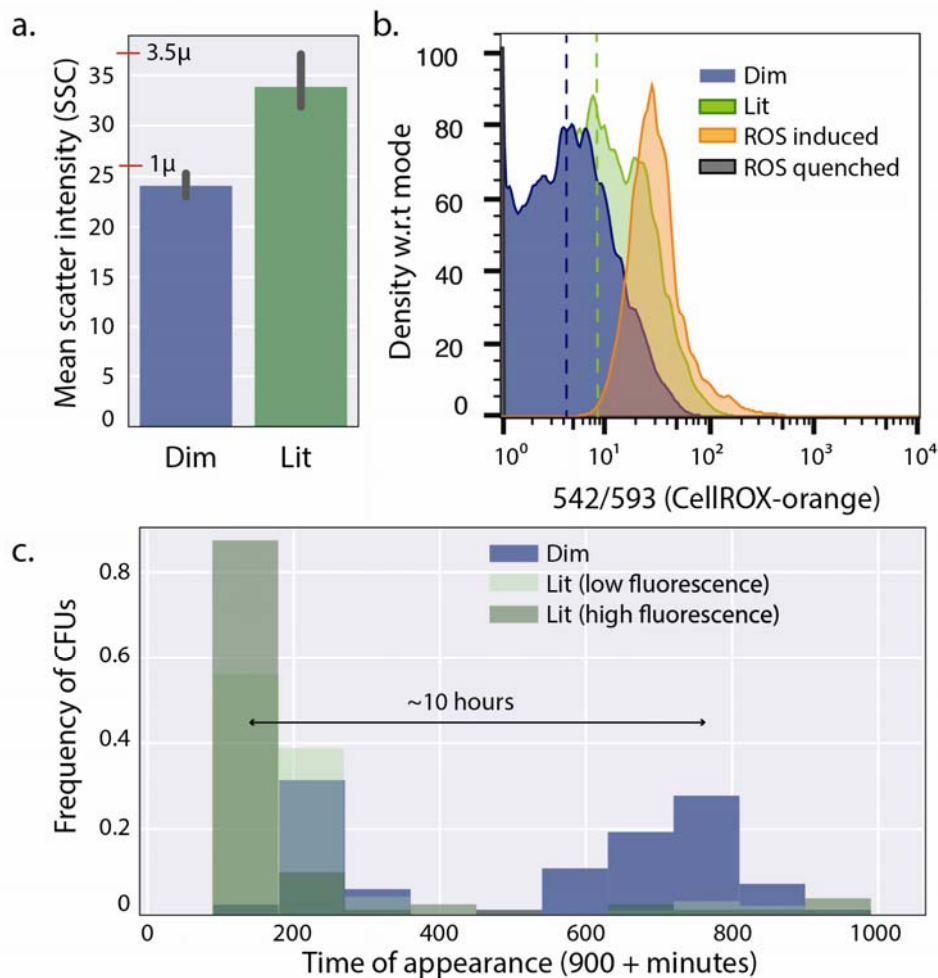

714  
715 **Figure 2:** Increased lag phase, slow growth and metabolic dormancy of persisters aid in  
716 tolerance to antibiotics. (a) Scatter intensity of dim and lit cells obtained from gates described in  
717 **Fig1a**, red lines on y axis represents mean scatter intensity of fluorescent beads of size 1µm and  
718 3.5µm. (b) CellRox-orange intensity, indicative of cellular ROS levels and oxidative state, was  
719 measured after incubating ATc induced MSM-mEos2 strain in CellRox-orange (5 µM/ml) for 2  
720 hours. MSM-mEos2 cells incubated in 100 µM TBHP and 2000 µM NAC (3 hours) was used as  
721 positive control (ROS induced, orange) and negative controls (ROS quenched, grey), respectively.  
722 *Note: Histogram of ROS-quenched cells is shifted in its entirety to zero CellROX-orange*  
723 *fluorescence, appearing as a line along the y-axis, and hence is not clearly visible in the plot.* (c)  
724 Lag phase of Per-Sorted dim, high and low fluorescing lit cells (100 cells, gates described in **Fig**  
725 **1a**) was determined by measuring time of appearance (TOA) of colonies on 7H10 plates  
726 supplemented with 0.5% glycerol and OADC, incubated at 37°C. Arrow indicates difference in  
727 average TOA of dim and lit (high and low fluorescing) population.  
728

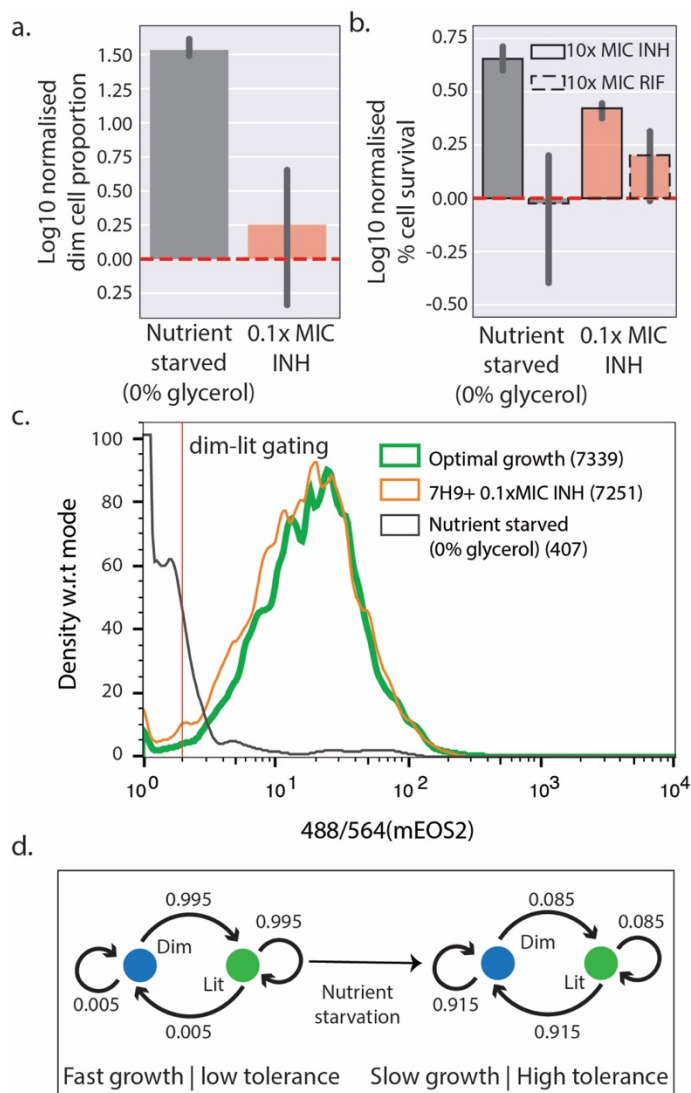

729  
730

731 **Figure 3:** Nutrient starvation induces anticipated stochastic switching of persisters. MSM-mEos2  
732 cultures were grown in 7H9 (0.5% glycerol), 7H9 (0.5% glycerol) + 0.1x MIC INH, and nutrient  
733 starvation (PBS, 0% glycerol) conditions. Cultures were induced with ATc (25ng/ul) and dim cell  
734 proportions were determined with Per-Sort (a) and other half on same cultures was incubated  
735 in 10xMIC INH (40 µg/ml) and 10x MIC RIF (35 µg/ml) (RIF) for 12 hours, washed and plated to  
736 determine tolerance similar to Fig 1e. Dashed red line indicates dim cell proportions and  
737 tolerance of cultures grown in 7H9 at optimal growth conditions. (c) Density of mEos2  
738 fluorescence intensity with respect to mode of the population in live cells of cultures grown in  
739 varying conditions mentioned in Fig 3a,b. Number of live single cell observed per 10000 cells  
740 observed in Per-Sort assay is mentioned in the parenthesis (d) Bet-hedging model with  
741 probabilistic conversions between dim and lit cells observed in the MSM cultures under normal  
742 and nutrient starved conditions.

743

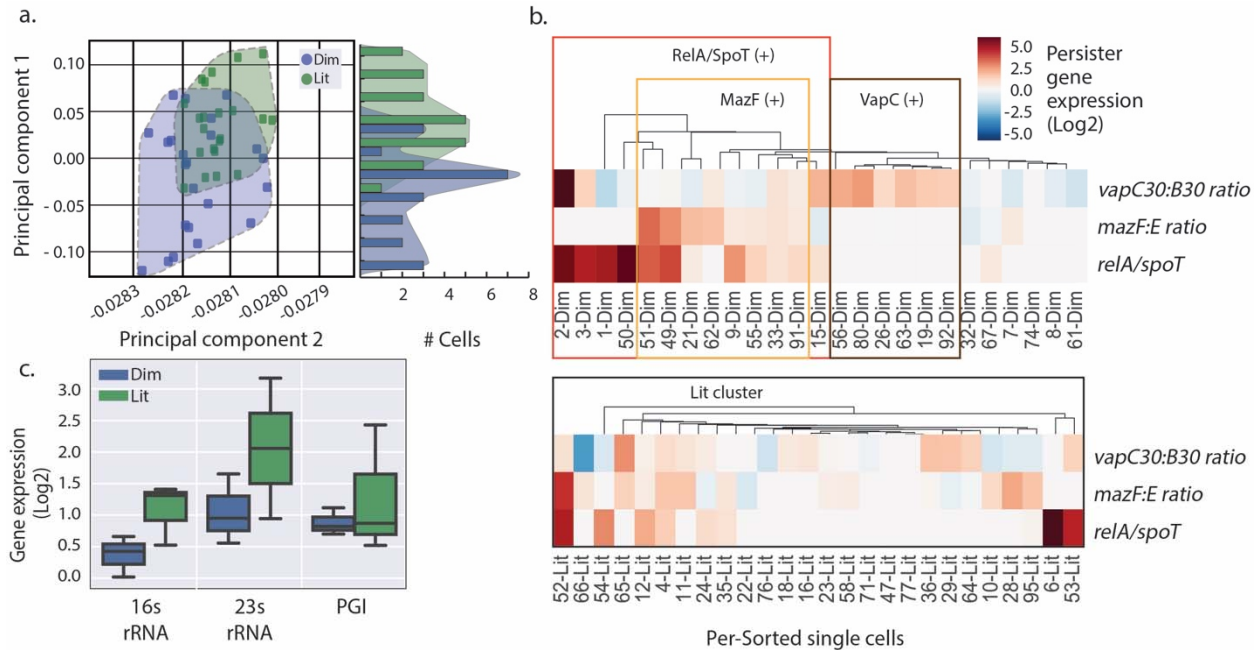

744  
 745 **Figure 4:** Overexpressed toxin genes and active alarmone response drive stochastic formation of  
 746 pre-existing persisters. (a) kPCA plot of dim and lit subpopulation performed with persister gene  
 747 expression and TA ratio of single-cells sorted with Per-Sort method. Shaded regions in the kPCA  
 748 plot represent area spanned by single cells of respective subpopulation. Histogram to the right  
 749 is drawn by binning the population by their principle component 1 values and shaded region is  
 750 drawn by connecting modes at every bin. (b) Persister gene expression based sub clusters in  
 751 Per-Sorted dim and Lit subpopulation. Boxes indicate cell clusters with AU/BP value > 90%.  
 752 Clusters were deemed significant if cell number in cluster > 4 cells (10% of subpopulation used  
 753 in assay). (c) rRNA expression levels in Dim and Lit subpopulation determined by qRTPCR from  
 754 100,000 Per-Sorted dim and lit cells. The metabolic gene *phospho-glucoisomerase* (PGI)  
 755 transcript was used as reference.  
 756

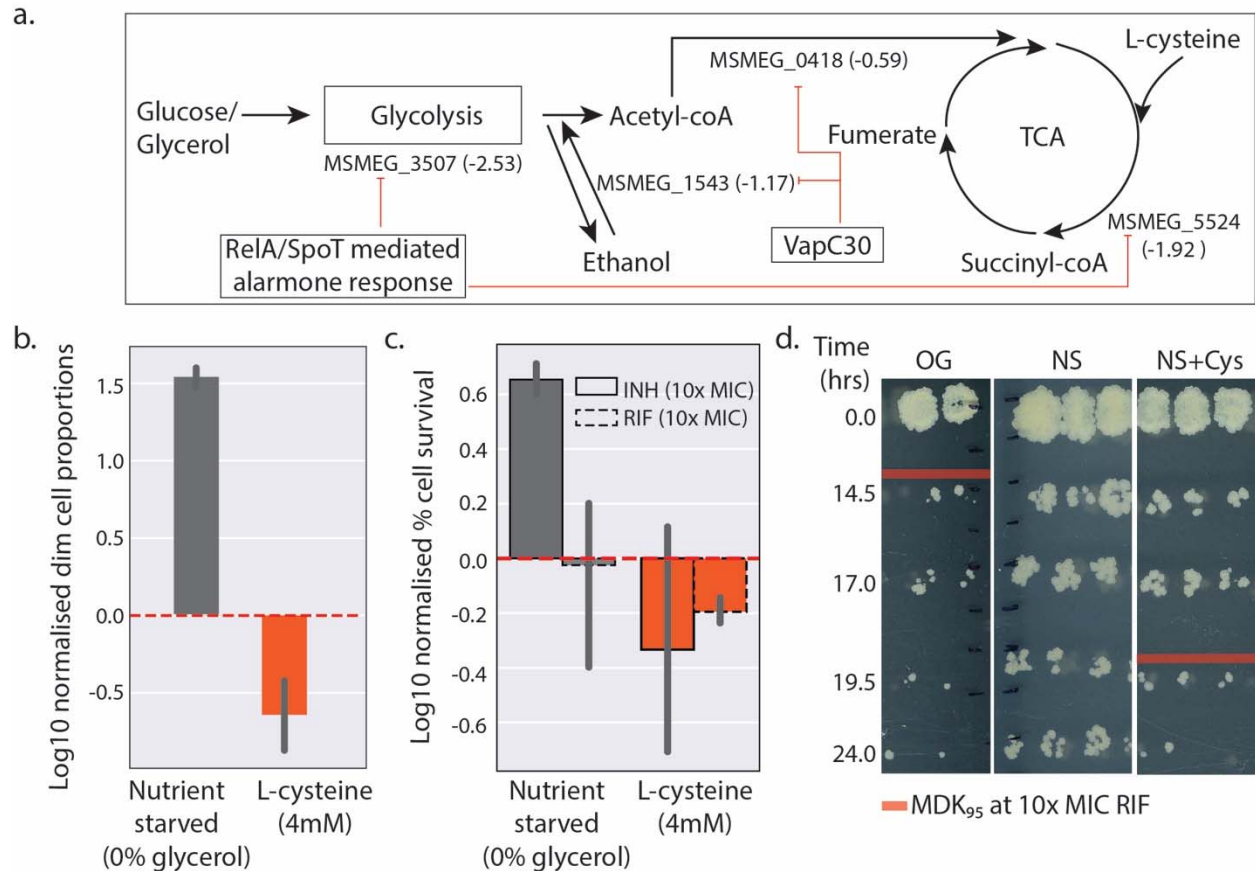

757  
 758 **Figure 5:** L-cysteine potentiates persister killing. Cultures were incubated in 7H9(Kan<sup>+</sup>),  
 759 PBS(Kan<sup>+</sup>) (Nutrient starvation- NS), and 7H9(Kan<sup>+</sup>) with 4mM L-cysteine (Cys). (a) Effects of  
 760 VapC30 over expression and RelA/SpoT mediated alarmone response on central carbon  
 761 metabolism determined by pathway analysis (see methods), Repressing (red edges with bars)  
 762 influences were derived from transcriptome analysis of GSE29631, GSE69681, and GSE69983  
 763 GEO gene expression datasets. Values in parentheses indicate magnitude of effect (log<sub>2</sub> fold  
 764 change). See Methods for details (b-c) Dim cell proportions and drug tolerance to INH and RIF of  
 765 cultures grown in nutrient starved condition (NS) and in presence of L-cysteine (Cys). Assay was  
 766 performed with method described in Fig 3a-b and values were normalized to cultures grown in  
 767 7H9. (d) Potentiator activity of L-cysteine was determined by adding L-cysteine along with 10x  
 768 MIC RIF (30 μg/ml) to nutrient starved cultures (NS, NS+Cys). Cultures were diluted in 7H9  
 769 media (1:100) and spotted onto 7H10 plates at varying time points to determine the MDK<sub>95</sub>  
 770 (Red line). Cultures grown in 7H9 at optimal growth conditions (OG) were used as reference.  
 771



772 **Supplementary figures and tables-**  
773

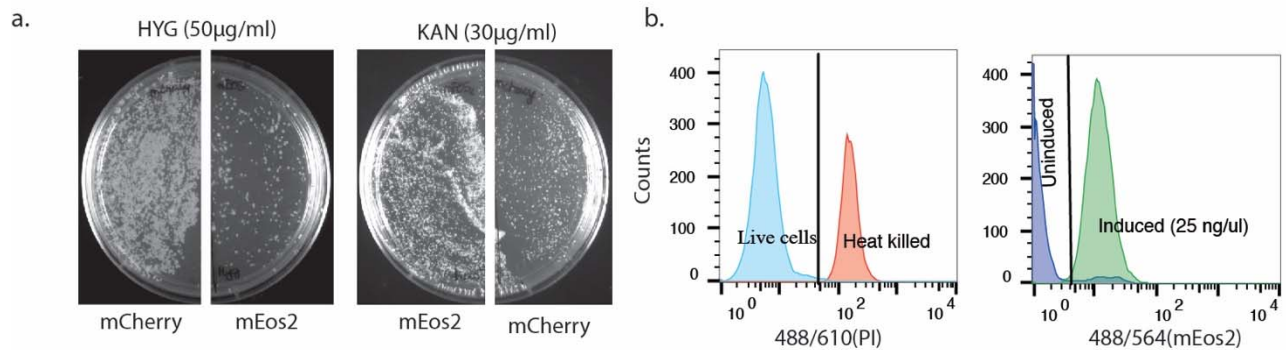

774 **Supplementary figure1:** (a) Efficiency in bacterial single cell sorting demonstrated by sorting  
775 equal-mixture of *M. smegmatis* with mCherry-Hyg<sup>R</sup> and mEos2-Kan<sup>R</sup> strains. Sorted cells plated  
776 on 7H10+HYG (right panel) and 7H10+KAN (left panel) plates. Plating shows 95% efficiency in  
777 single cell sorting. (b) Gating strategies used in identification of dim cells. Gating between PI  
778 stained live and dead mEos2 strains (left panel), and PI stained non-fluorescing uninduced and  
779 ATc (25ng/µl) induced mEos2 strains (right panel).  
780  
781

782

783

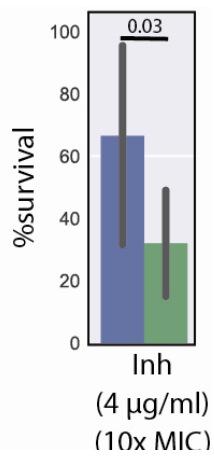

784

785

786 **Supplementary figure2:** Tolerance of PER-sorted dim and lit cells of *M. tuberculosis*-mEos2

787 strain to 10x MIC INH measured after 3 days similar to **fig1e**.

788

789  
790

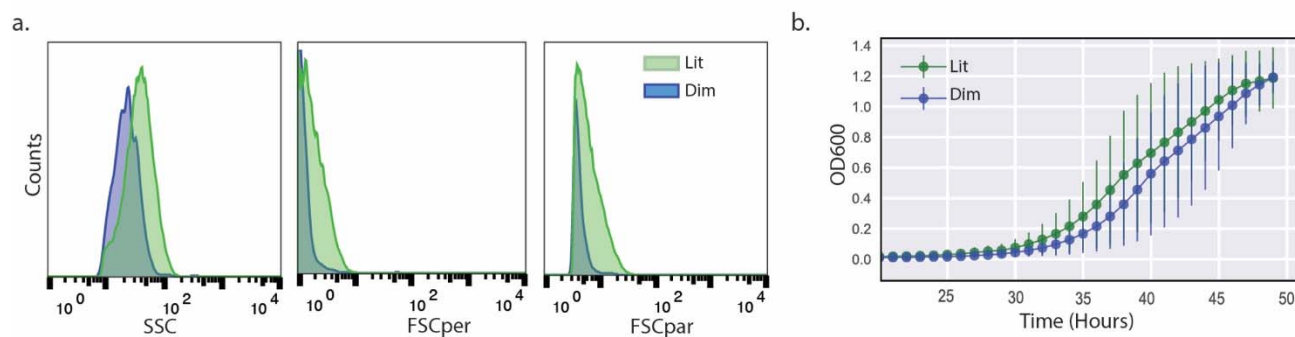

791  
792  
793  
794  
795  
796

**Supplementary figure3:** (a) Comparison of scatter intensities of PER-sorted dim and lit cells in *M. smegmatis*. (b) Growth curve of PER-sorted 1000 *M. smegmatis*-mEos2 dim and lit cells measured as optical density at 600 nm.

797  
798

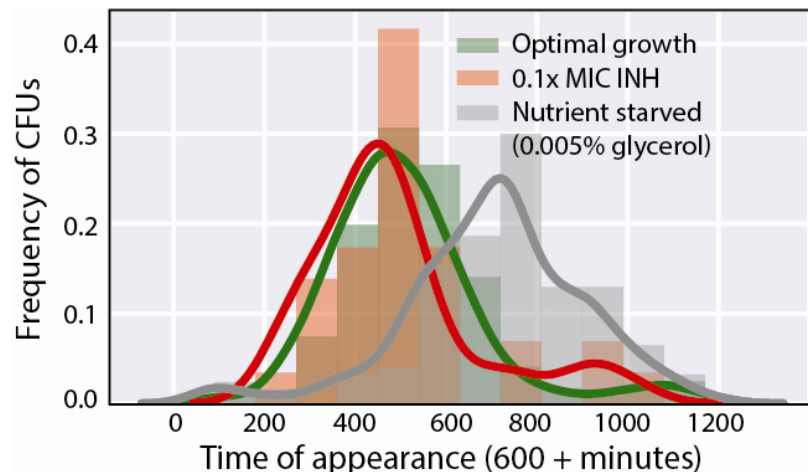

799  
800 **Supplementary figure4:** Time of appearance of colonies in cultures grown in optimal growth  
801 media (7H9 with 0.2% glycerol), 7H9 + 0.1x MIC INH, and nutrient starved media (7H9 with  
802 0.005% glycerol).  
803  
804

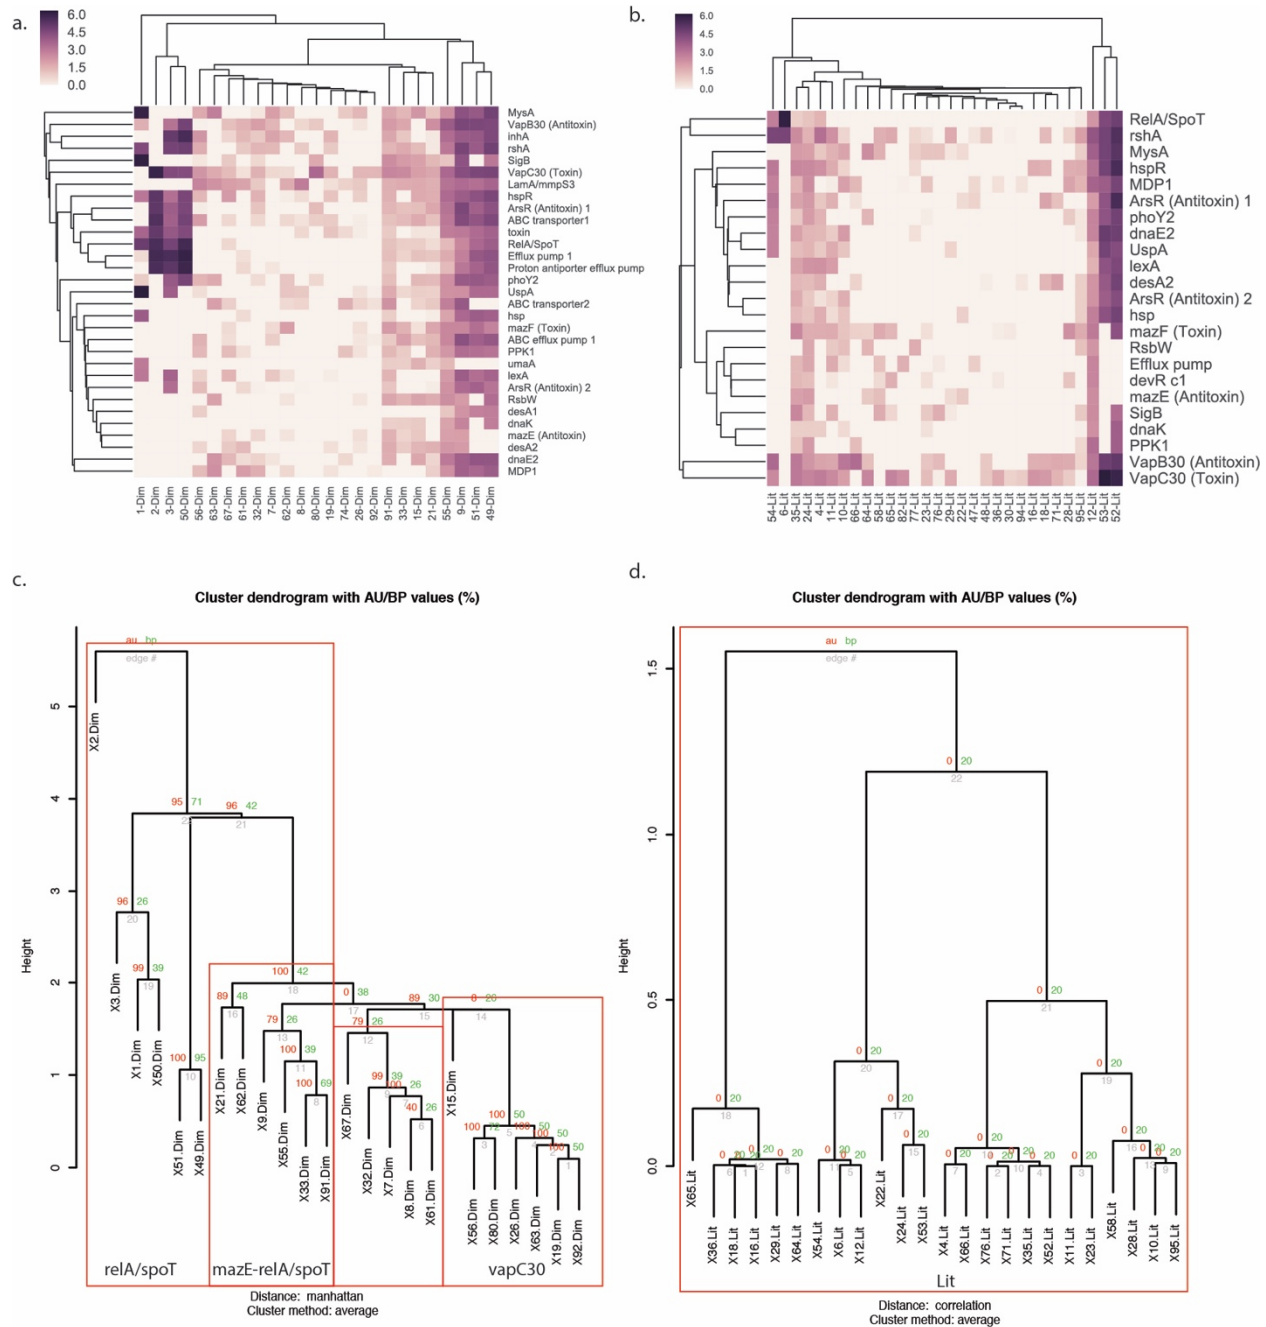

805  
 806 **Supplementary figure 5:** (a,b) Hierarchical clustering of single cell persister gene expression for  
 807 dim (a) and lit (b) subpopulation. (c,d) Hierarchical clustering with PV clust based on *relA/spoT*  
 808 expression and TA ratio of *vapC30:vapB30* and *mazF:E* of per-Sorted dim (c) and lit (d) Clusters  
 809 were assigned for nodes with AU/BP value > 90% and > 4 cells (10% of sub-population used in  
 810 assay). Clusters were named based on their highly expressed gene or pathway.

811  
 812  
 813  
 814

815 **Supplementary table1:** Genes used in single cell persister gene expression assay  
816

| <b>MSM gene ID</b>              | <b>Gene name</b>              | <b>Gene function</b>                |
|---------------------------------|-------------------------------|-------------------------------------|
| MSMEG_2817                      | ABC efflux pump 1             | ABC efflux pump 1                   |
| MSMEG_5659                      | ABC transporter1              | ABC transporter1                    |
| MSMEG_5660                      | ABC transporter2              | ABC transporter2                    |
| MSMEG_3945                      | ABC transporter3              | ABC transporter3                    |
| MSEMG_2740                      | lexA                          | Alarmone response                   |
| MSMEG_2965                      | relA/spoT                     | Alarmone response                   |
| MSMEG_2391                      | ppk1                          | Alarmone response                   |
| ECC2_spikein<br>RNA             | Assay control                 | Control                             |
| PBR372 region of<br>pstKi mEOS2 | Genomic DNA control           | Control                             |
| MSMEG_1633                      | dnaE2                         | DNA replication                     |
| MSMEG_3151                      | inhA                          | Drug target                         |
| MSMEG_2723                      | RecA                          | Drug target                         |
| MSMEG_4427                      | Efflux pump 1                 | Efflux pump 1                       |
| MSMEG_3944                      | devR c1                       | Metabolic control                   |
| MSMEG_6384                      | katG                          | Metabolic control                   |
| MSMEG_5244                      | devR c2                       | Metabolic control                   |
| MSMEG_1605                      | phoY1                         | Persister phenotype associated gene |
| MSMEG_5776                      | phoY2                         | Persister phenotype associated gene |
| MSMEG_1915                      | rshA                          | Persister phenotype associated gene |
| MSMEG_4265                      | lamA/mmpS3                    | Persister phenotype associated gene |
| MSMEG_0913                      | umaA                          | Persister phenotype associated gene |
| MSMEG_5773                      | desA1                         | Persister phenotype associated gene |
| MSMEG_0916                      | desR                          | Persister phenotype associated gene |
| MSMEG_5248                      | desA2                         | Persister phenotype associated gene |
| MSMEG_0424                      | hsp                           | Persister phenotype associated gene |
| MSMEG_4466                      | uspA                          | Persister phenotype associated gene |
| MSMEG_5141                      | narK2                         | Persister phenotype associated gene |
| MSMEG_1803                      | rsbW                          | Persister phenotype associated gene |
| MSMEG_6225                      | Proton antiporter efflux pump | Proton antiporter efflux pump       |
| MSMEG_2389                      | mdp1                          | Regulator                           |
| MSMEG_0709                      | dnaK                          | Regulator                           |
| MSMEG_2752                      | SigB                          | Sigma factor                        |
| MSMEG_1914                      | rpoE1                         | Sigma factor                        |
| MSMEG_2758                      | mysA                          | Sigma factor                        |

|            |                    |                       |
|------------|--------------------|-----------------------|
| MSMEG_0713 | hspR               | Sigma factor          |
| MSMEG_1277 | un-annotated       | TA operon (Antitoxin) |
| MSMEG_1283 | vapB30 (Antitoxin) | TA operon (Antitoxin) |
| MSMEG_3180 | antitoxin          | TA operon (Antitoxin) |
| MSMEG_4175 | arsR (Antitoxin) 1 | TA operon (Antitoxin) |
| MSMEG_4447 | mazE (Antitoxin)   | TA operon (Antitoxin) |
| MSMEG_6762 | arsR (Antitoxin) 2 | TA operon (Antitoxin) |
| MSMEG_1278 | Un-annotated       | TA operon (Toxin)     |
| MSMEG_1284 | vapC30 (Toxin)     | TA operon (Toxin)     |
| MSMEG_3181 | toxin              | TA operon (Toxin)     |
| MSMEG_4176 | arsR (Toxin) 1     | TA operon (Toxin)     |
| MSMEG_4448 | mazF (Toxin)       | TA operon (Toxin)     |
| MSMEG_6760 | arsR (Toxin) 2     | TA operon (Toxin)     |

817

818

819 **Supplementary table2 : Primers used in the study**

820

| MSM gene ID | FP                   | RP                   |
|-------------|----------------------|----------------------|
| MSMEG_1277  | GGCGGATGACCTGTCGCTGA | GGCGACCCTGCGCTTGTG   |
| MSMEG_1278  | CCATGCGCTGGTCGACGGTA | TCCTCCGCGGATCGACATC  |
| MSMEG_1283  | GAGGCGGTGGTGATGGCACT | GAGGCGGTGGTGATGGCACT |
| MSMEG_1284  | GCGGTGGCTGACGATCCTGT | GAGTTCGCGACCACCTGGCT |
| MSMEG_3180  | TCGCGGTGCTCATGGACGAC | CGGGCACGTGCACTGCATTC |
| MSMEG_3181  | CCGGACGCGGTCTACGTGTT | AAGCTCACCCGCACGATCCC |
| MSMEG_4175  | TGCCCTGGTCGACGGTGAAC | GACCTCGCGCAGCACCTTGA |
| MSMEG_4176  | GGCACGGTGCTTCGCTTCAC | CGGTCGAAGAAGGCGTGGGT |
| MSMEG_4447  | ACCGAGTACGCCGACATCGC | GGCGGCGACCAACTCAGACT |
| MSMEG_4448  | AATCGAGCCAACGCCAGCCA | CGACACGGTGCGTCAAGCTG |
| MSMEG_6760  | CCCGGACGGCGAGAAGTACG | AGCGAACCCGTCGAGGAACG |
| MSMEG_6762  | CACGAGGCGCGACATCATGC | AGCAGGCCGGCTTTCTCCAG |
| MSMEG_2694  | CACTTTCGCGCGTGCTCACC | GCCATGGACACCTGCGGGAT |
| MSMEG_4671  | GATCGCCCGCAAGAGCGAGA | GACGCCTGCGTACCCTCCAG |
| MSMEG_4466  | CGGTTCCGCCACATCACCT  | GGTGAGCGCGTAGACGGTGT |
| MSMEG_1803  | GTGGATCCCGGTCCCGATGC | CAGGCCCGGACCCATCTGTG |
| MSMEG_1633  | AGTGGGCCCGCATGGAGAAC | CCGAGGCCAGCATGTCGAA  |
| MSMEG_6384  | CCGGTGAGCGTGACCTGGAG | TGCGGATCCGGATTGCCGTT |
| MSMEG_2389  | CACAGAAGCTCCCGGCCGAT | CACAGAAGCTCCCGGCCGAT |
| MSMEG_3151  | TCGACGGTGTGGTGCACTCG | GCGCGTCGAAGAACGGGTTG |
| MSMEG_2723  | CAGGCGCTGCGCAAGATGAC | CTCGGGCGAGCCGAACATCA |
| MSMEG_2740  | GACACCGGCGAGTTCACGGA | TCGAGGATGGTGCGCTGACG |
| MSMEG_2965  | GTGCTCGCCGACGAGAAGGT | GTGCTTCGGGTCGCCATCT  |
| MSMEG_1915  | GCCTGCGGCATTACGGCATC | TCGTGGTGCGGCTGATCTGG |
| MSMEG_4265  | GCCGACGTGGCGCTCTATGA | GCCGACGTGGCGCTCTATGA |
| MSMEG_5659  | TGGCGTCTCGGCCTGATGTG | TACGTGCGGGCGGATTCGTT |
| MSMEG_0913  | GGAAGTCCGCCTGCAGGGTT | GGGTAGCGCTCGGCCTTGAA |
| MSMEG_5660  | GTGACCATCCGCCGGTTCA  | CAGCAGGATCGCGGTGACCA |
| MSMEG_0709  | GCGACCTCCGGTGACAACCA | GATGCCCGAGCTGCCCTTGA |
| MSMEG_0424  | AATCCGACGGCCGCACCTAC | CCGGCGACCCGTACCTCAG  |
| MSMEG_0713  | ACCTGCTGCGAGAGGTGCAG | AGCGCGTCGACCTGATTGGT |
| MSMEG_3932  | CATGCGCTCGGTGACACTGC | TCTCCACCGCGACACGCTTC |
| MSMEG_5141  | GGTCGGATCGTTGGGACGCA | CAGGATCGACGCGACCGTCA |
| MSMEG_3945  | ATCCACGGCGAGTCGAAGGC | CGTCGAGAGGCTGCGTCGAA |
| MSMEG_0880  | GGTCGGCAACGAGGGTGTCA | CTCGGCGTCGGTCACGAAGT |
| MSMEG_1583  | CATCGCCGATCGCGTCAAGC | AGCCGCTCCTGCAGCTTCTC |



|                                       |                        |                       |
|---------------------------------------|------------------------|-----------------------|
| MSMEG_2391                            | GCTGTTGGAGCGCGCAAAT    | AGCGCACCGACAGACCCATC  |
| MSMEG_3944                            | CGACCCGAAGTCGCGTTCT    | GTGGCCTCGTCGGACGTGAA  |
| MSMEG_5244                            | TCACCCAGCAGGAGCGTGTG   | CGCGCCGCGATCTGTTTGT   |
| MSMEG_1605                            | CCGATCTGACGCTGGCCGAA   | GTGCATGGACCCGACGACCA  |
| MSMEG_5776                            | CACGCGGGATCCGGAGAAGG   | CCACTCGCGGTCCATCAGCA  |
| MSMEG_2752                            | TCGACATGCCGGTCGGAACC   | GGCGGACATGGCCTCGGAAT  |
| MSMEG_1914                            | GTCCAACGCCGAGCACTCCT   | GCTTGCAACGCGGCCTTGAT  |
| MSMEG_2758                            | AGGGCGAGAAGCTGCCAGTG   | GCAGGTTGCGCTCCAGCAGA  |
| MSMEG_2817                            | TGGGAGCCGCTGGCTTCTAC   | CCGACGACGGTACCGAGGAA  |
| MSMEG_4427                            | GCGGTTTGGCTTCCGCAGTC   | GCGGCGCTGACCTTCAACAC  |
| MSMEG_6225                            | GGGTGCCGTGGTGTGATGA    | CCAGGCCCGTGACCATCAGG  |
| MSMEG_5773                            | GGCCTCGACATCGCGCCGAA   | GCGGAGCACCGGCATCACGA  |
| MSMEG_0916                            | CCGTGCGCGGTGTCCAGCTC   | ATGCCGCACAGCGCGTACCA  |
| MSMEG_5248                            | GCGGGCCTCGACGTGATCGG   | CTCGGCGACGTTGGCGACCT  |
| Assay control<br>(Spike in)           | TCCAGATTACTTCCATTTCCGC | GCTGGATGCCGACGCCCGTAT |
| Genomic DNA<br>control (NT<br>region) | TGGCTGCTGCCAGTGCGGAT   | GCCCGACCGCTGCGCCTTAT  |

821  
822  
823  
824  
825  
826
